# Supplementary material
Source: publisher site journal article supplement (https://www.dovepress.com/article/458138)
Supplement: Supplementary file 1 [file get_supplementary_file.php]

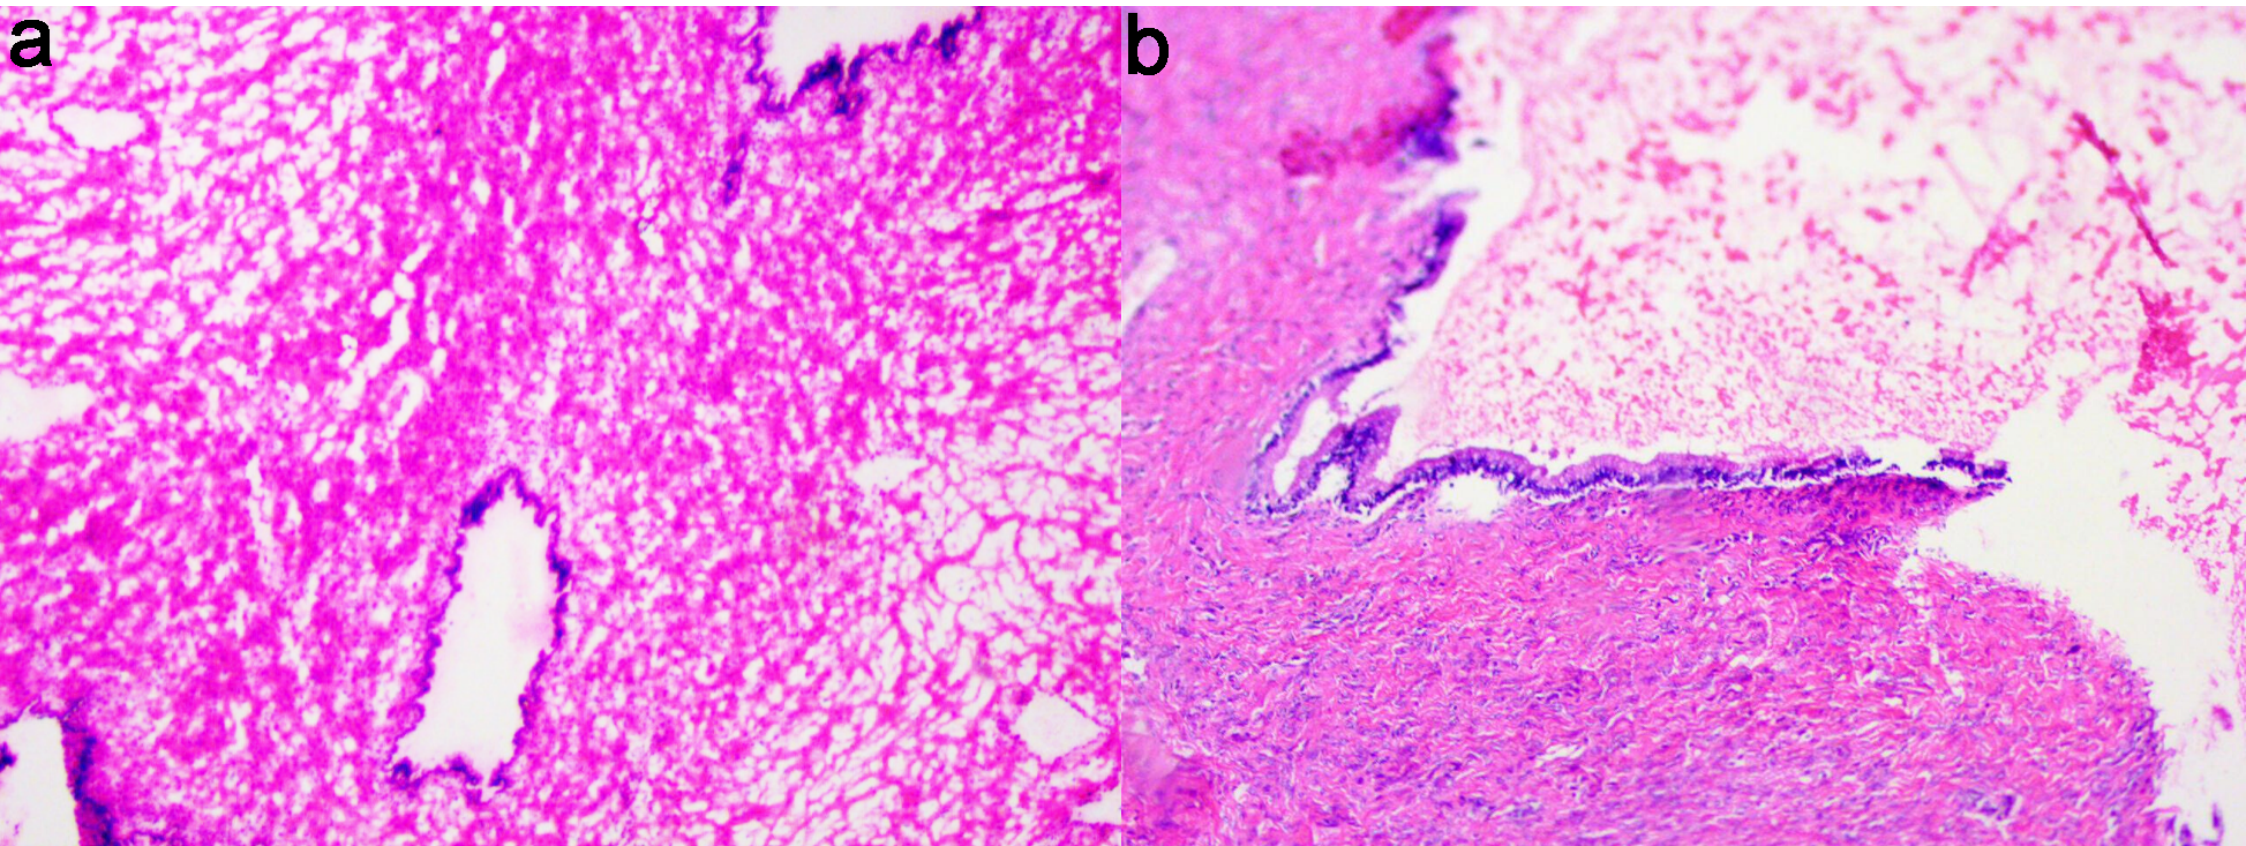

Figure S1: (a) FS showed only areas of mucinous cystadenoma; (b) after extensive sampling, a small focal borderline tumor was identified on PS.



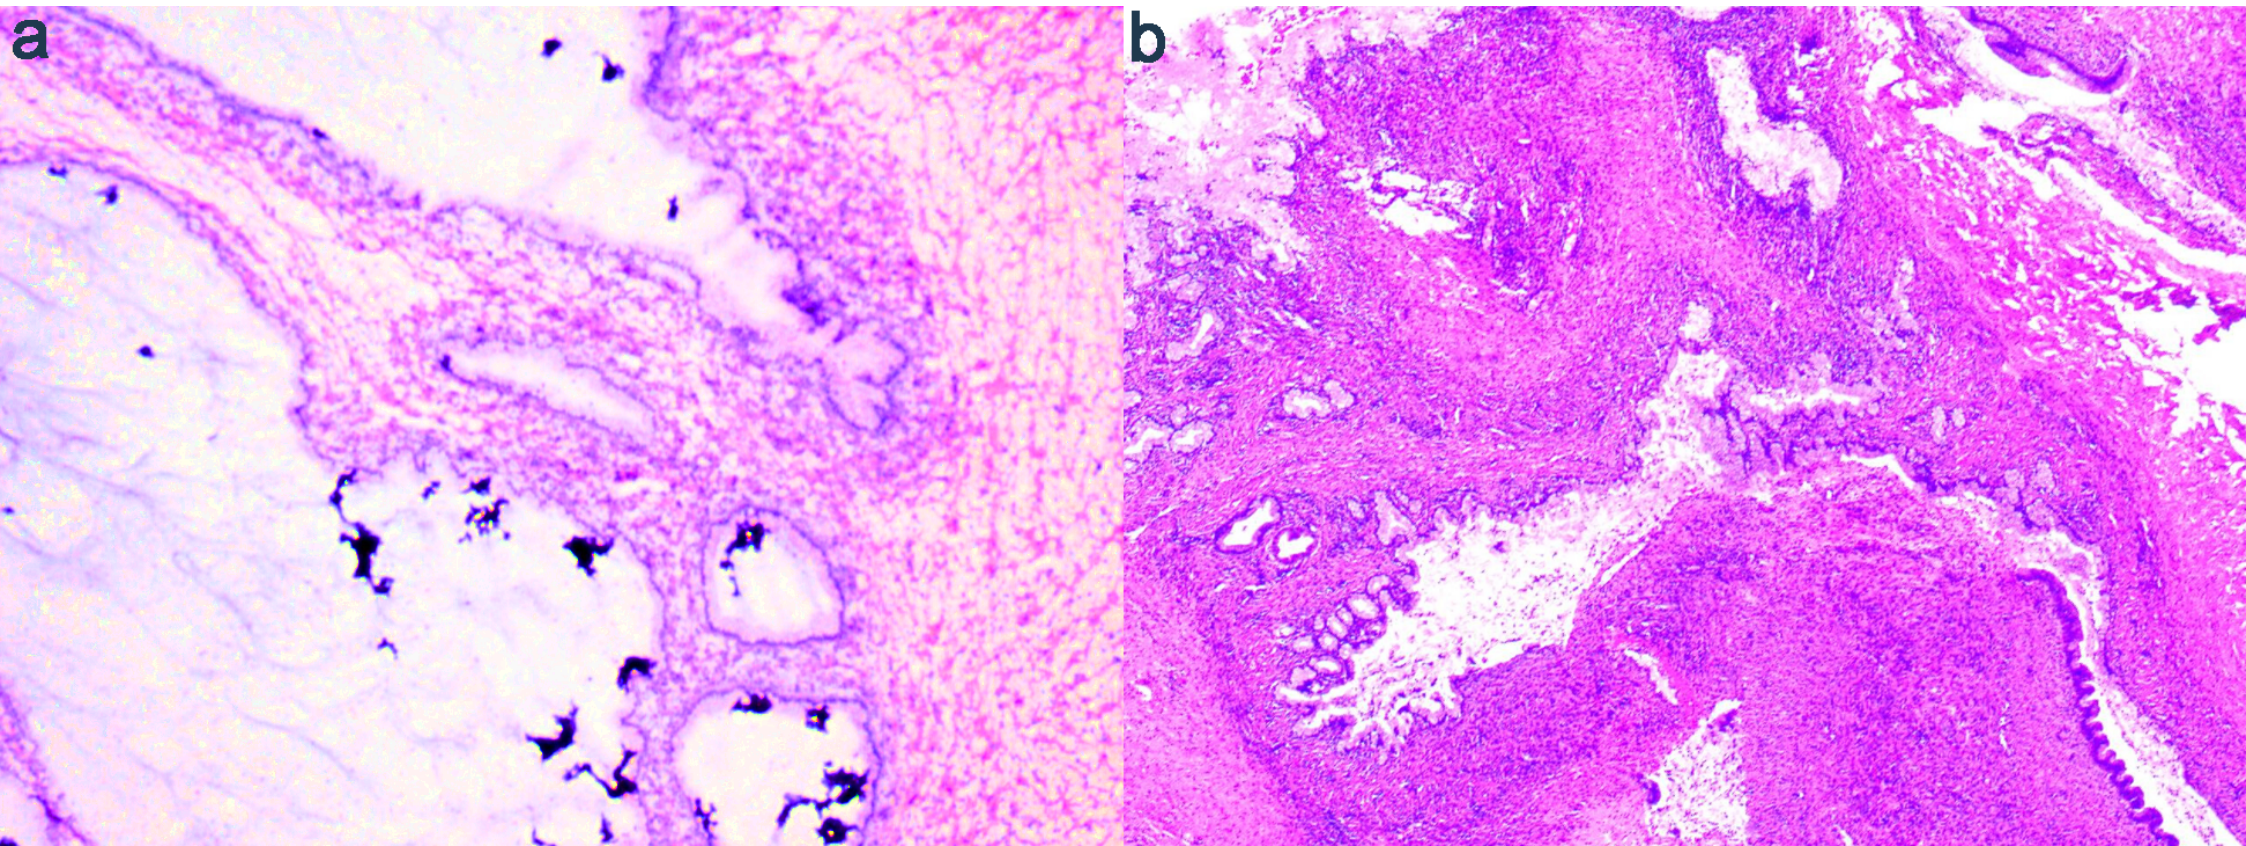

Figure S2: (a) benign ovarian tumor featuring the presence of mucus in the cystic lumen was impressed on FS slide; (b) areas of focal borderline tumor were identified on PS.



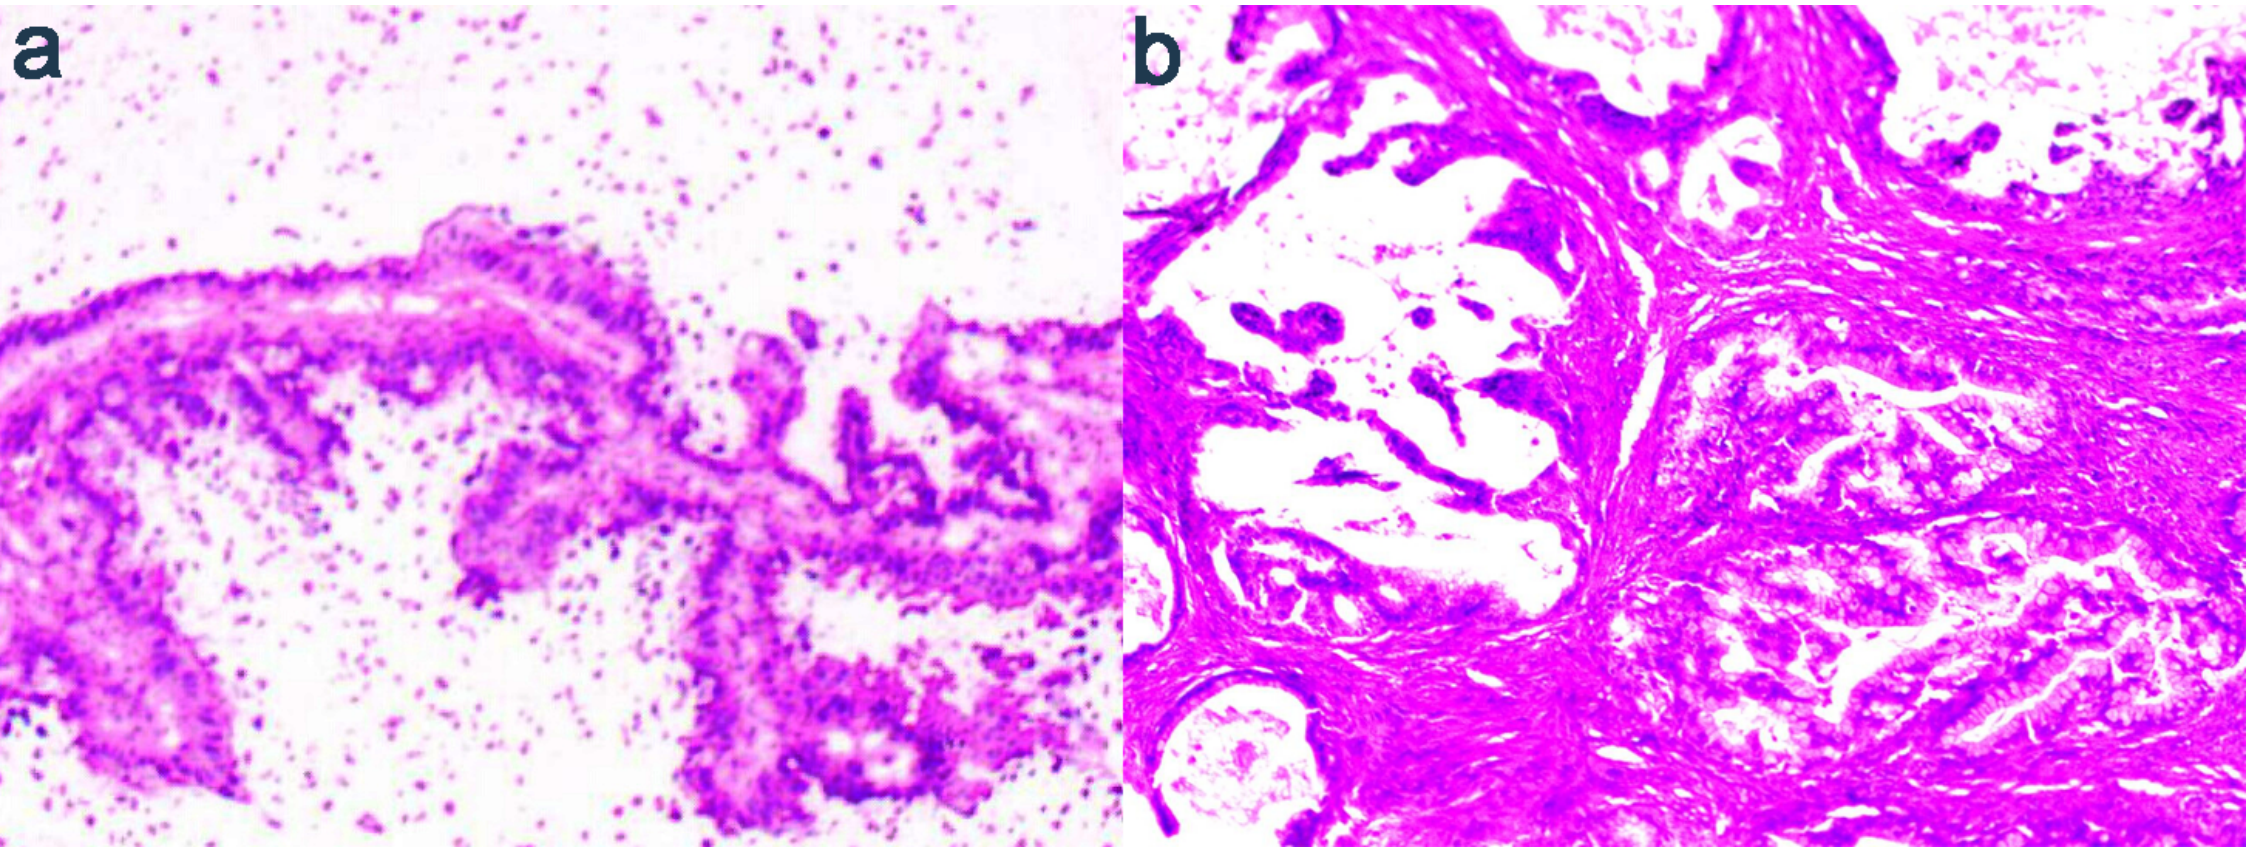

Figure S3: (a) FS showed areas consistent with borderline mucinous tumor; (b) additional sections showed foci of expansile invasion in a background of borderline tumor.



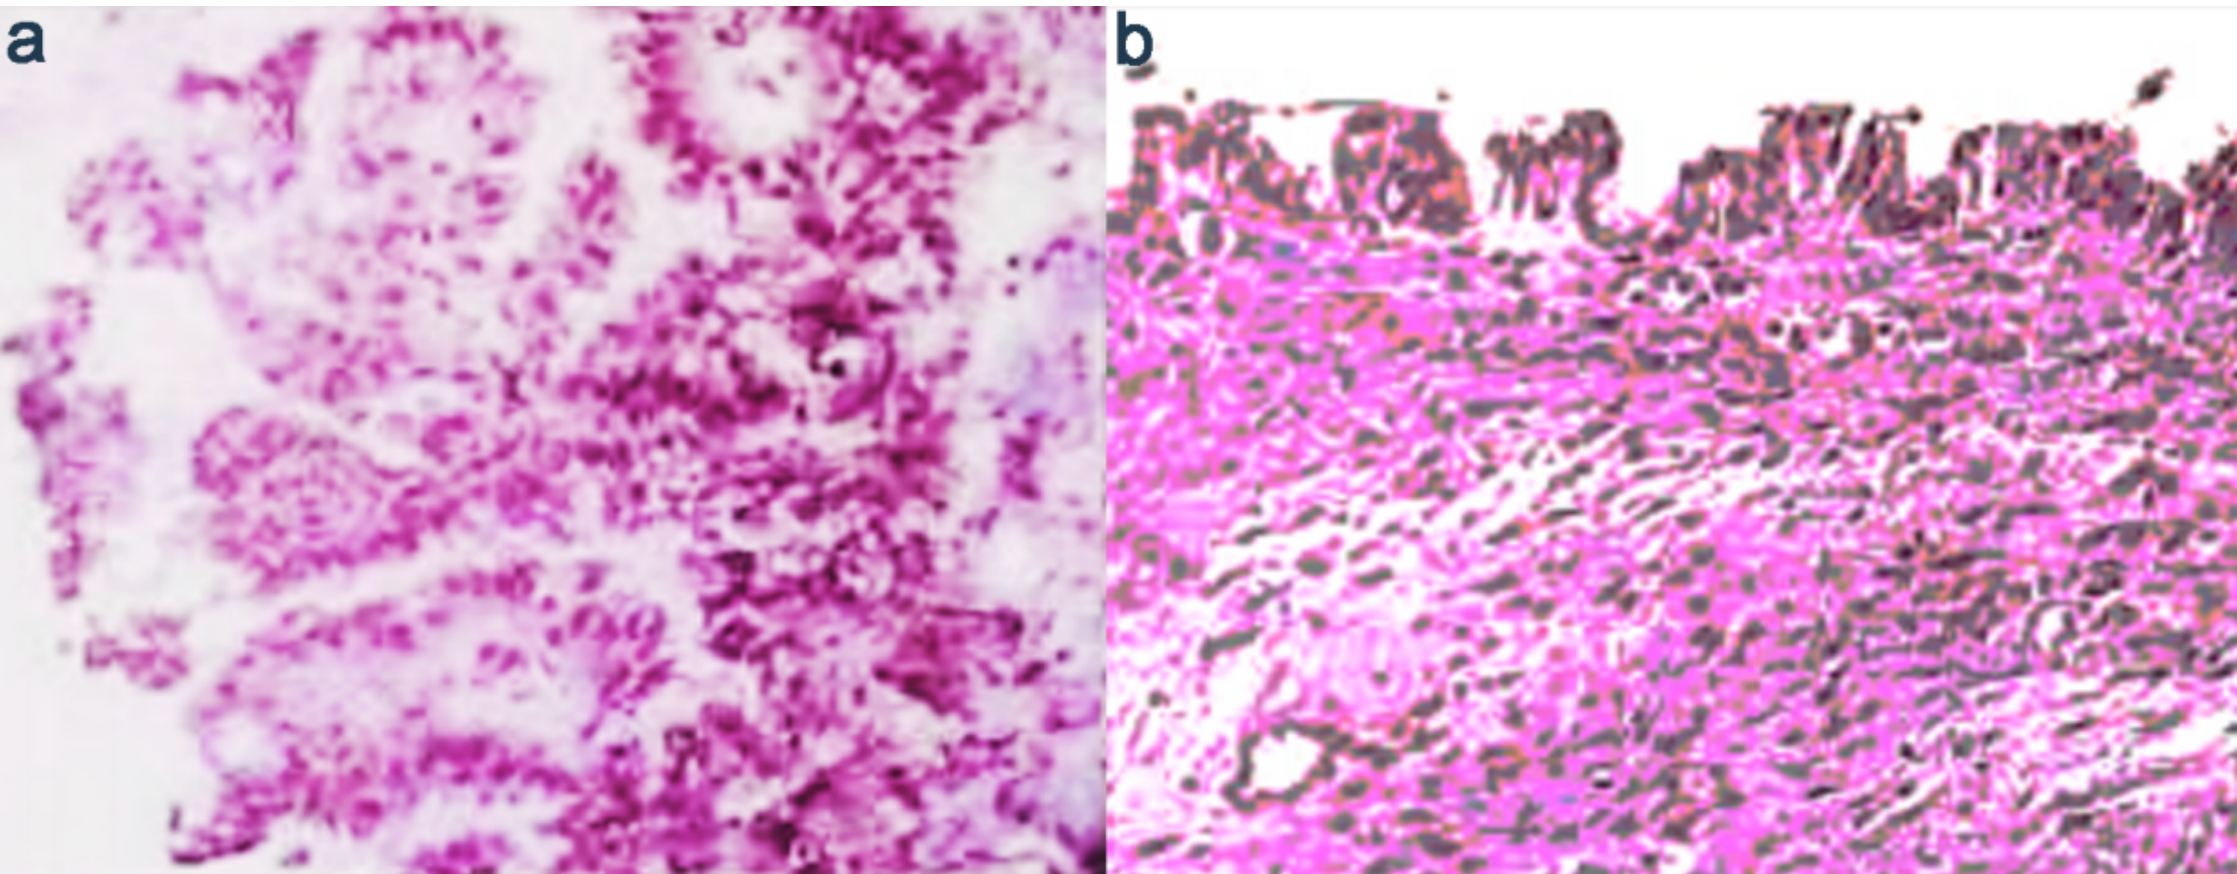

Figure S4: (a) papillary projections on FS lead to diagnostic suspicion of focal borderline changes; (b) mixed serous and mucinous ovarian cystadenoma was classified on PS.
